# Supplementary material
Source: Springer Nature journal article supplement (https://www.springermedizin.de/resource/supplementary/12885_2012_3530_MOESM4_ESM.pdf/9463586)

# Age X Gender Effect in Total Psychosocial Problems

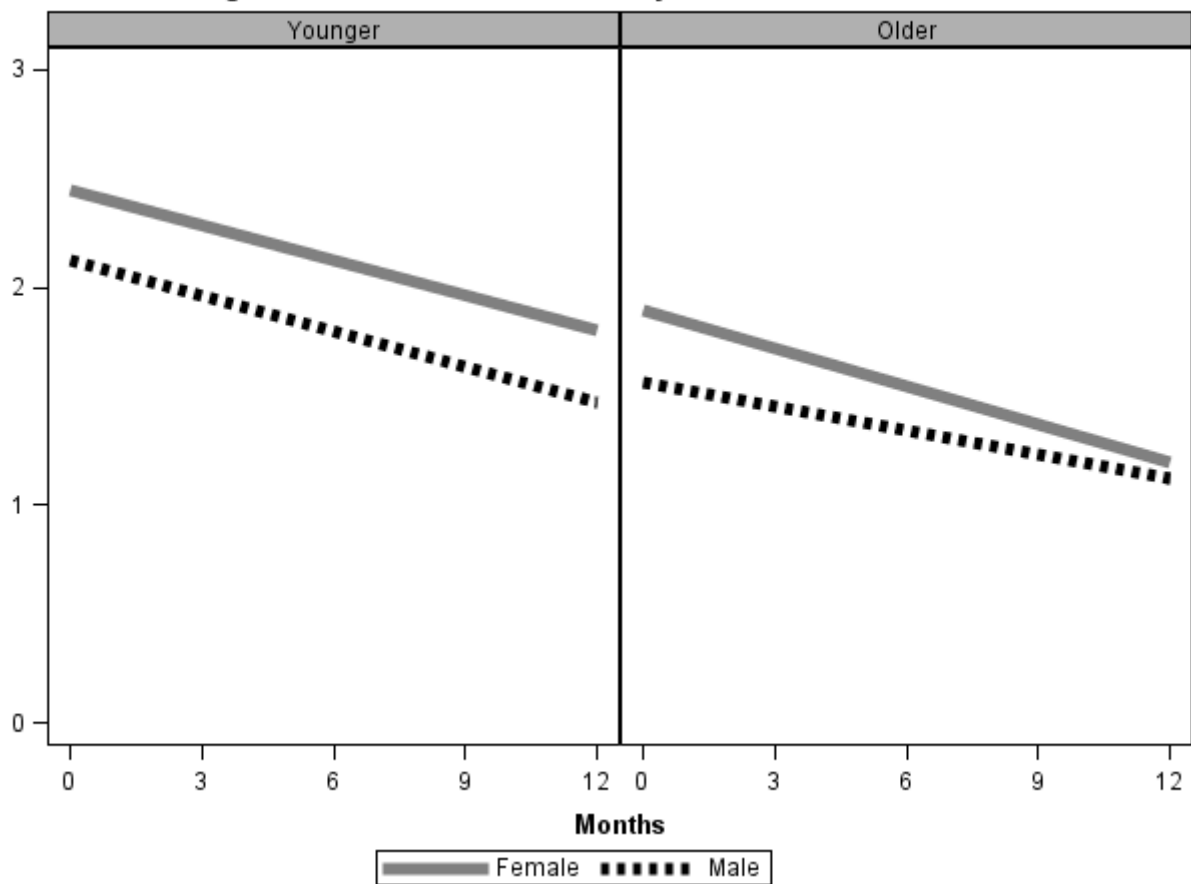

Supplement: MOESM4 [file 9463586]
